# Supplementary material
Source: Springer Nature journal article supplement (https://www.springermedizin.de/resource/supplementary/12998_2012_73_MOESM3_ESM.docx/9680082)
Supplement: MOESM3 [file 9680082]

Table 3 : Results

| **At Baseline** | **Reference N°** | **Development of LBP over time** | | | | **Comments** |
| --- | --- | --- | --- | --- | --- | --- |
| **Stable** | **Fluctuating** | **Worsening** | **Improving** |
| **No LBP** | 8 | No LBP at BL was highly predictive of future absence of pain throughout 8 surveys over 2 years |  |  | NA |  |
| 9 | 45% with no pain at 3 surveys over 5 years |  |  | NA |  |
| 10 | 70% no pain at second survey and 57% at 3rd survey over 8 years |  |  | NA |  |
| 11 | 67% and63% respectively no pain at 2nd and 3rd survey over 28 years |  | 64% had LBP at the 4th survey (28 years later) | NA |  |
| 12 | NA | NA | NA | NA | Not applicable : all participants were chosen because they had LBP |
| 13 | The most frequent course was no BP each year over 5 years (35%) |  |  | NA |  |
| 14 | - 29% of the population was free of LBP at 3 surveys over 10 years - 62% never had long standing LBP at 3 surveys over 10 years |  | - 11% developed long standing LBP at 2nd and 3rd survey over 10 years | NA |  |
| 15 | Stable (visual analysis) |  |  |  |  |
| **Presence of LBP** | 8 | Presence of LBP at BL was highly predictive of future pain throughout 8 surveys over 2 years |  |  |  |  |
| 9 | If >30 days of LBP at BL: 39% in the same category after 1 and 5 years | If 1-30 days of LBP at BL: 62% fluctuated to the neighboring groups over 5 years |  |  |  |
| 10 | 38% have the same intensity of LBP at 3 surveys over 8 years | 27% of LBP (intensity) fluctuated ; movements between extremes groups were rare (12%) at 3 surveys over 8 years | 17% of LBP (intensity) increased at 3 surveys over 8 years | 19% of LBP (intensity) decreased at 3 surveys over 8 years |  |
| 11 | 75, 73 and 88% were symptomatic at 3 FUs over 28 years  31% of the subjects reported LBP in all 4 surveys |  |  |  |  |
| 12 | Stability of severity and frequency of LBP was high in 4 periods over 1 year |  |  | 3% reported no pain after BL throughout the weekly surveys over one year |  |
| 13 | The most frequent course was BP each year over 5 years (14%) |  |  |  |  |
| 14 | 6% had long standing LBP at 3 surveys over 10 years | 11% had long standing LBP only at some surveys over 10 years |  | 10% had recovered from LSLBP at 2nd and 3rd |  |
| 15 | For those who had more than 8 days of BP during that first year (visual analysis) | For those who have between 1-7 days of BP the first year of the 5-yr study period (visual analysis) |  |  |  |

LBP: Low back pain; FU: Follow-up; BL: Baseline; NA: Not Applicable
